# Supplementary material for: Fossil fish assemblage of the Laguna Formation, Philippines: Unveiling the uniqueness of Pleistocene freshwater ecosystems in Southeast Asia
Source: Research Square preprint supplement (doi:10.21203/rs.3.rs-5055249/v1), 2024-12-25
Supplement: Supplementary file 1 [file 498880c8207d8cc8d682e34c.xlsx]

## Sheet: List1
Herklotsichthys
Specimen number	Head pointed to	Counterpart of	SL	TL	measurable length	HL		HD		orbit diameter		max BD		pre-D		pre-A		CPL		CPD
			mm	mm	mm	mm	% of SL	mm	% of SL	mm	% of HL	mm	% of SL	mm	% of SL	mm	% of SL	mm	% of SL	mm	% of SL
COG-002 (Fig. S1)	left	NMP-1415c	38.7	47.4	47.4	11.5	29.7158	10.2	26.3566	--		--		--		27.7	71.5762	4.8	12.4031	4.3	11.1111
NMP-1415c (Fig. S1)	right	COG-002	--	--	43.6	--		--		--		--		--		26.8		5.1		4.1
COG-005 (Fig. 3A)	right	COG-003	38.5	45.7	45.7	11.9	30.9091	10.5	27.2727	2.8	23.5294	12.1	31.4286	17.9	46.4935	27.6	71.6883	5.1	13.2468	4.9	12.7273
COG-003 (Fig. 3B)	left	COG-005	37.7	44.1	44.1	13.1	34.748	10.8	28.6472	2.8	21.374	12.3	32.626	17.7	46.9496	28.3	75.0663	5.1	13.5279	4.9	12.9973
NMP-1415a (Fig. S1)	right	NMP-1416b	--	--	37.5	11.8		11.2		3.8	32.2034	--		18.7		32.2		--		--
NMP-1416b (Fig. S1)	left	NMP-1415a	--	--	23.9	--		10.7		--		--		--		--		--		--
NMP-1415d (Fig. S1)	right	NMP-1415e	--	--	26.2	12		10.5		3.2	26.6667	--		17.1		--		--		--
NMP-1415e (Fig. S1)	left	NMP-1415d	--	--	25.3	12.1		10.9		3.1	25.6198	--		15.6		--		--		--
COG-004 (Fig. 3C)	left	--	33.8	40.2	40.2	12.9	38.1657	10.5	31.0651	2.9	22.4806	11.1	32.8402	16.9	50	26.6	78.6982	3.7	10.9467	4.5	13.3136
COG-006 (Fig. S1)	left	--	43.1	--	43.1	12.4	28.7703	10.3	23.8979	--		13.4	31.0905	19.3	44.7796	31.3	72.6218	6.2	14.3852	--
COG-007 (Fig. S1)	left	--	--	--	46.4	--		11.8		4.5		16.3		--		--		--		--
NMP-1416c (Fig. S1)	right	--	--	--	47.7	16		--		3.8	23.75	--		--		--		--		--
